# Supplementary figures and images for: Arp2/3 complex activity enables nuclear YAP for naïve pluripotency of human embryonic stem cells
Source: eLife journal article supplement (doi:10.7554/elife.89725), 2024-09-10

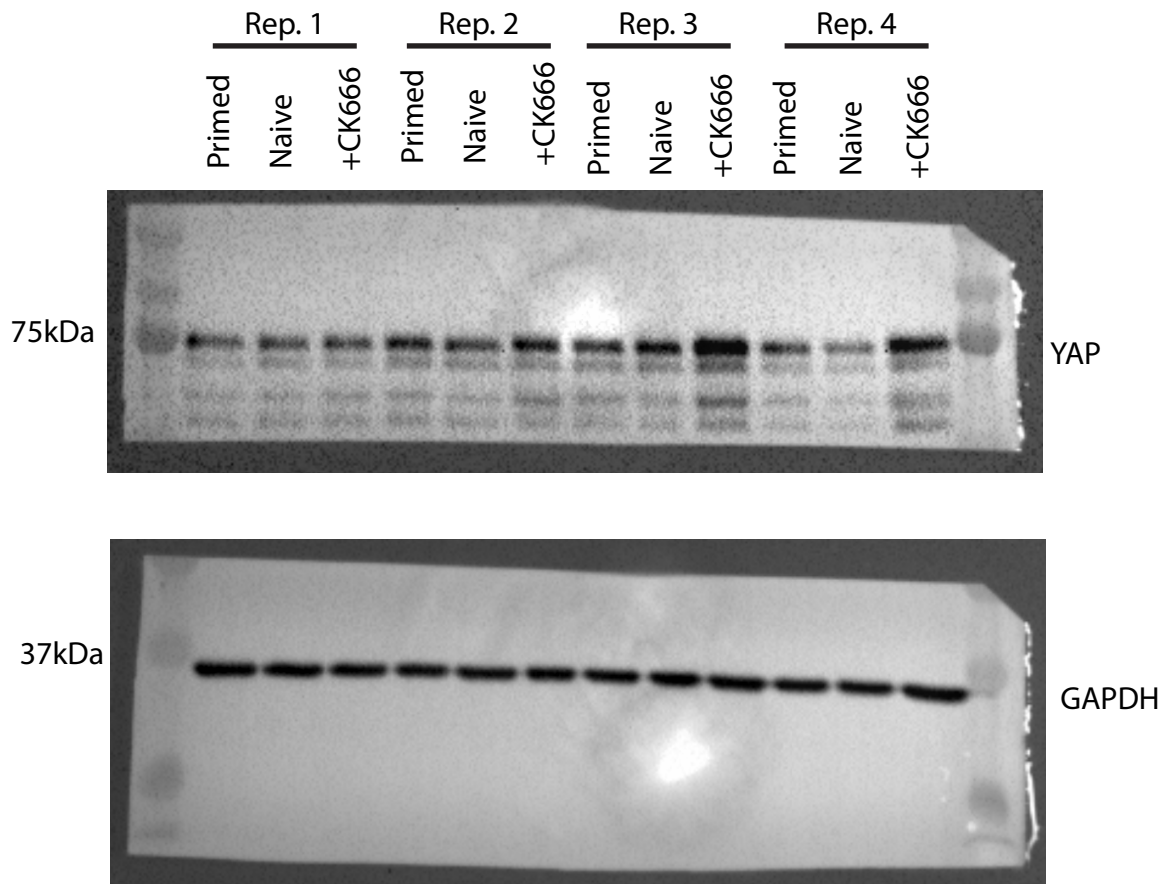

Supplement: supp [file elife-89725-supp-v1.zip]
